# Supplementary material for: Identification of consistent post-translational regulatory triplets related to oncogenic and tumour suppressive modulators in childhood acute lymphoblastic leukemia
Source: PeerJ. 2021 Jul 14;9:e11803. doi: 10.7717/peerj.11803 (PMC8286060; doi:10.7717/peerj.11803)
Supplement: Supplemental Information 7 [file peerj-09-11803-s007.xlsx]

## Sheet: Sheet1
Transcription factors	Modulators	Target genes
AFF3	AFF3	CNTN1
AFF3	MET	EP300
AFF3	NRAS	P2RX7
AFF3	BCL2L11	RAG2
ARID5B	BAALC	CALR
ARID5B	BLK	CD200
ARID5B	BAALC	DOK2
ARID5B	S100A8	FGGY
ARID5B	SEPT4	ST8SIA4
ARNT	NRAS	HERC2
ARNT	MECOM	IL4
ARNT	TFPI2	XPC
CEBPA	DNMT3B	ALOX5
CEBPA	DNMT3B	CD14
CEBPA	WT1	CD33
CEBPA	AFF3	CDA
CEBPA	FLT3	CEBPB
CEBPA	DNMT3B	CSF3R
CEBPA	FLT3	CSF3R
CEBPA	VEGFA	CTSB
CEBPA	CDKN2A	FCER1G
CEBPA	DNMT3B	FCER1G
CEBPA	FLT3	FCER1G
CEBPA	DNMT3B	GRN
CEBPA	AFF3	HK3
CEBPA	DNMT3B	HK3
CEBPA	FLT3	HK3
CEBPA	WT1	IRF5
CEBPA	CRLF2	KLRD1
CEBPA	BCR	LGALS3
CEBPA	DNMT3B	LGALS3
CEBPA	DNMT3B	LYZ
CEBPA	MERTK	PYGL
CEBPA	DNMT3B	RAB31
CEBPA	DNMT3B	S100A8
CEBPA	DNMT3B	S100A9
CEBPA	STAT5A	SAMHD1
CEBPA	AFF3	SERPINA1
CEBPA	DNMT3B	SERPINA1
CEBPA	FLT3	SERPINA1
CEBPA	FLT3	SIRPA
CEBPA	MME	SIRPA
CEBPA	MERTK	TFEC
CEBPA	GSTP1	TRIB1
CEBPE	IL7R	CST7
CEBPE	RPL10	PLAUR
CEBPE	BAALC	SYNJ2
CREBBP	IKZF1	CDK4
CREBBP	CTCF	HIF1A
CREBBP	RB1	HIF1A
CREBBP	IDH1	MAP1LC3B
CREBBP	RB1	SF3B1
CREBBP	RPL10	XRCC6
CTCF	AFF1	CELSR2
CTCF	XIAP	FHL3
CTCF	EZH2	MAP3K9
CTCF	CYLD	NCL
CTCF	CASP8	PBK
CTCF	ABL1	TRRAP
DNMT1	RPL5	DDX5
DNMT1	YY1	DOCK2
DNMT1	DNMT3B	HELLS
DNMT1	CDX2	HLTF
DNMT1	DNMT3A	KPNB1
DNMT1	SOX4	KPNB1
DNMT1	FOXO3	PRKDC
DNMT1	BHLHE41	RGS11
DNMT1	IL7R	SNRNP200
DNMT1	PRDM16	STMN1
DNMT1	CDX2	WEE1
DNMT3A	FBXW7	AFF4
DNMT3A	TP53	CUX1
DNMT3A	NPM1	DPP8
DNMT3A	SEPT4	PPIP5K2
DNMT3A	AFF3	SLTM
DNMT3B	STAT5A	LCT
ETV6	CTCF	RPS6
EZH2	CASP8	ATAD2
EZH2	PLK1	CCDC109B
EZH2	XIAP	FMR1
EZH2	ABL1	FOXM1
EZH2	NRAS	R3HDM2
EZH2	FBXW7	TIMP1
EZH2	NRAS	ZC3H7A
FOXO3	AFF1	APAF1
FOXO3	MME	IDH2
FOXO3	AFF1	KIAA0368
FOXO3	IKZF1	MAP3K8
FOXO3	CXCL12	NFKB1
FOXO3	AFF1	TGFBR1
GFI1	CASP8	RAG2
IRF4	ETV6	CSF2RB
IRF4	FLT3	CSF2RB
IRF4	CXCL12	HLA-DPB1
IRF4	STAT3	LYN
IRF4	HSPA1A	MUTYH
MECOM	SOX4	CDX2
MECOM	AKT1	MEIS1
MECOM	CTCF	PAWR
MLLT10	FBXW7	MAP1LC3B
MLLT10	CASP8	PTCD3
MLLT10	VEGFA	R3HDM2
MLLT10	VEGFA	XRCC4
MNX1	CTGF	BCAP29
NFKB1	CXCL12	FOXO3
NFKB1	ABL1	GSS
NFKB1	TCF3	LCT
NFKB1	ABL1	MED13
NFKB1	ABL1	PIK3C2A
NFKB1	FOXO3	SELL
NFKB1	TAC1	SGSH
NFKB1	BCR	UBE2H
NR3C1	CYLD	CCR4
NR3C1	DNMT1	CYLD
PAX4	AFF3	AQP5
PAX4	FLT3	CDH6
PAX4	TAC1	CYP2A6
PAX4	CEBPA	HOXA4
PAX4	TFPI2	NGF
PAX4	CYLD	NKX2-5
PAX4	EZH2	NKX2-5
PAX5	ETV6	CSF2RB
PAX5	ABL1	FOXO1
PAX5	ETV6	HLA-DRB1
PAX5	ETV6	PDE4B
PAX5	ABL1	PTPRJ
PRDM16	GFI1	ADIPOQ
PRDM16	PRDM16	DMBT1
RELA	CASP8	ARAP1
RELA	DNMT3A	EP300
RELA	YY1	MEN1
RELA	BCL2L11	RNF19B
RELA	BAALC	TGFB1
RELA	AFF1	TSC2
RUNX1	PRDM16	CRIM1
RUNX1	BAALC	DOK2
RUNX1	WT1	GDE1
RUNX1	VEGFA	PICALM
RUNX1	BAALC	SH2D1A
RUNX1	GFI1	SMC4
RUNX1	MET	WNT16
RUNX1	BAALC	ZAP70
STAT3	BAALC	CD200
STAT3	IRF4	GFI1B
STAT3	BAALC	HLA-E
STAT3	IRF4	NFE2
STAT3	IRF4	NKX3-1
STAT3	BLK	RAPGEF5
STAT3	SEPT4	RARA
STAT3	MTOR	SEMA4D
STAT5A	TCF3	CTGF
STAT5A	PTEN	LGALS9
STAT5A	AFF1	STAT5B
STAT5A	CREBBP	STAT5B
STAT5A	SEPT4	TNIP2
STAT5B	HSPB1	CD1C
STAT5B	HSPB1	DUSP11
STAT5B	ATM	IL6ST
STAT5B	BAALC	MSN
STAT5B	AFF1	STAT5A
STAT5B	CREBBP	STAT5A
TCF3	BHLHE41	RDX
TCF3	JAK2	SIGIRR
TCF3	IKZF1	TSC2
TLX3	FLT3	A1CF
TLX3	FAS	ADIPOR2
TLX3	TAC1	BACH2
TLX3	MTOR	BGN
TLX3	VEGFA	FHL5
TLX3	NBN	IL21
TLX3	SEPT4	ITPR2
TLX3	JAK2	OLIG2
TLX3	WT1	PGK2
TLX3	RPL10	REN
TLX3	FAS	TIMP1
TLX3	PBX1	TNFRSF11B
TP53	SET	ARID4B
TP53	RPL5	CD8A
TP53	LAT2	ERCC1
TP53	HSPB1	MACROD1
TP53	DNMT1	POLD1
TP53	DNMT3A	POLD1
TP53	DNMT3B	ZC3H4
WT1	ABCG2	ANXA5
WT1	PLK1	ANXA5
WT1	FBXW7	CCDC109B
WT1	DNMT1	CD27
WT1	FBXW7	CD8A
WT1	MME	INSR
WT1	FBXW7	OGG1
WT1	MME	ZMIZ1
YY1	NSD1	ARF1
YY1	NBN	BRAF
YY1	NUP98	FAM155B
YY1	PAX5	LRRC42
YY1	THBD	MARCO
YY1	NSD1	POP4
YY1	RPL5	PPP4C
YY1	MERTK	RPA1
YY1	NSD1	SPAG9
YY1	NSD1	TARDBP
YY1	NSD1	ZNF639
ZFX	ETV6	MAN2A1
ZFX	CDX2	PRKAA1
ZFX	THY1	RB1CC1
