# Supplementary material for: Identification of consistent post-translational regulatory triplets related to oncogenic and tumour suppressive modulators in childhood acute lymphoblastic leukemia
Source: PeerJ. 2021 Jul 14;9:e11803. doi: 10.7717/peerj.11803 (PMC8286060; doi:10.7717/peerj.11803)
Supplement: Supplemental Information 8 [file peerj-09-11803-s008.xlsx]

## Sheet: Sheet1
Cell death gene list	Cell proliferation gene list	Hematopoiesis gene list	Activation of leukocytes and lymphocytes gene list
IL10	IL10	IL10	IL10
CDKN1B	CDKN1B	SOX4	SOX4
SOX4	SOX4	CYLD	CYLD
CYLD	CDKN2A	CDKN2A	CDKN2A
CDKN2A	CDKN2B	CDKN2B	HFE
ABL1	EPS15	IL15	IL15
GHRL	IL15	ERCC1	ERCC1
HK3	ABCC4	ERCC2	ABL1
HDAC4	CDX2	ABL1	HDAC4
RIPK1	ABL1	CEBPA	HLA-A
IDO1	GHRL	CEBPE	IDO1
BAG1	CEBPA	HDAC4	TNFSF13
MECOM	HDAC4	RIPK1	HLA-DPA1
HMGB1	HLA-A	GATA2	HLA-DPB1
NCAM1	IDO1	ETV6	HLA-DRB1
BIRC7	TNFSF13	MECOM	HLA-DRB4
MDK	HLA-DPA1	HMGB1	GATA2
PTEN	HLA-DPB1	IRF4	HMGB1
MDM2	HLA-DRB1	IKZF1	NBN
PICALM	HLA-DRB4	PICALM	IRF4
PTGS2	GATA2	GFI1	IKZF1
BDNF	MECOM	STAT5A	TLR6
DDX3X	HMGB1	STAT5B	BCR
STAT3	NBN	FANCD2	STAT5A
STAT5A	NCAM1	JAK2	STAT5B
STAT5B	BIRC7	JAK3	FANCD2
ABCB1	PTEN	PTPN11	JAK3
BLK	MDM2	BRAF	PTPN11
JAK2	EZH2	BRCA2	BRAF
JAK3	PTGS2	BTK	CXCR4
S100A8	BDNF	KMT2A	HPRT1
S100A9	STAT3	PRMT1	BTK
MET	STAT5A	MERTK	MIF
BRAF	STAT5B	MMP9	AKT1
CXCR4	BLK	KIT	TAC1
NFKB1	JAK1	NOTCH1	MERTK
BTG1	JAK2	VEGFA	KIT
BTK	JAK3	FOXO3	CXCL12
MIF	BRAF	FLT1	TCF3
NQO1	BRCA2	TCF3	FLT3
AKT1	BTG1	FLT3	LAT2
MMP2	BTK	RB1	CASP8
MERTK	MIF	CASP8	TLR9
MMP9	KMT2A	RUNX1	XRCC4
PLK1	AKT1	XRCC4	FAS
HSPA1A	TAC1	FAS	ZAP70
KIT	MMP9	ZAP70	LEP
HSPA1B	KIT	LEP	LEPR
BCL2L13	NOS3	LEPR	LIG4
NOS3	NOTCH1	LIG4	IGFBP2
NOTCH1	CXCL12	ARNT	THY1
CXCL12	DNMT1	MTOR	MTOR
HSPB1	VEGFA	CD34	CTLA4
DNMT3A	FOXO3	TNF	ATM
VEGFA	KRAS	CTLA4	IL2
MPO	NPM1	ATM	EP300
FOXO3	FLT1	PBX1	IL6
KRAS	CXCR3	IL2	TP53
NPM1	TCF3	PRDM16	IL7R
CASP8AP2	FLT3	IL3RA	CXCL8
ABCC1	FLT4	EP300
CXCR3	ATF5	IL6
FLT3	NRAS	TOP2A
SET	RB1	TP53
FLT4	WT1	IL7R
ATF5	XIAP
BCL2L11	BIRC5
RB1	RELA
SEPT4	NR3C1
WT1	RUNX1
CASP8	XRCC4
XIAP	FAS
BIRC5	FASLG
RELA	TERT
NR3C1	ZAP70
XRCC4	LEP
FAS	CCNA2
CBL	CCND2
FASLG	GSTP1
TERT	COL18A1
OGG1	LIG4
CREBBP	ARNT
LEP	IGFBP2
GSTP1	CD9
COL18A1	TIMP1
LIG4	TIMP2
TIMP1	MTOR
MTOR	CD33
CD34	TET1
ASNS	CTGF
CTGF	TNF
TNF	CTLA4
CTLA4	ATM
PAX4	TNFRSF1A
ATM	PBX1
TNFRSF1A	IL2
IL1RN	PRAME
IL2	IL6
PRAME	TP53
EP300	CXCL8
IL6	FBXW7
TOP2A	CYBA
TP53
FBXW7
