# Supplementary material for: Identification of consistent post-translational regulatory triplets related to oncogenic and tumour suppressive modulators in childhood acute lymphoblastic leukemia
Source: PeerJ. 2021 Jul 14;9:e11803. doi: 10.7717/peerj.11803 (PMC8286060; doi:10.7717/peerj.11803)
Supplement: Supplemental Information 9 [file peerj-09-11803-s009.xlsx]

## Sheet: Sheet1
Transcription factors	Target genes
ARID5B	DOK2
CEBPA	CSF3R
CEBPA	IRF5
CEBPA	S100A8
CEBPA	TRIB1
CREBBP	CDK4
CREBBP	HIF1A
CTCF	PBK
DNMT1	HLTF
DNMT1	STMN1
DNMT3A	CUX1
EZH2	FOXM1
FOXO3	APAF1
FOXO3	MAP3K8
FOXO3	NFKB1
MECOM	CDX2
MECOM	MEIS1
MECOM	PAWR
NFKB1	FOXO3
NR3C1	CYLD
PAX5	FOXO1
PAX5	PTPRJ
PRDM16	DMBT1
RELA	MEN1
RELA	TGFB1
RELA	TSC2
RUNX1	DOK2
STAT3	GFI1B
STAT3	NKX3-1
STAT3	RARA
STAT5A	CTGF
STAT5A	STAT5B
STAT5B	STAT5A
TCF3	TSC2
TP53	MACROD1
YY1	ARF1
YY1	BRAF
YY1	RPA1
YY1	SPAG9
ZFX	PRKAA1
ZFX	RB1CC1
